# Supplementary material
Source: publisher figshare collection journal article supplement (https://acs.figshare.com/ndownloader/files/11211524)
Supplement: Supplementary file 1 [file 11211524]

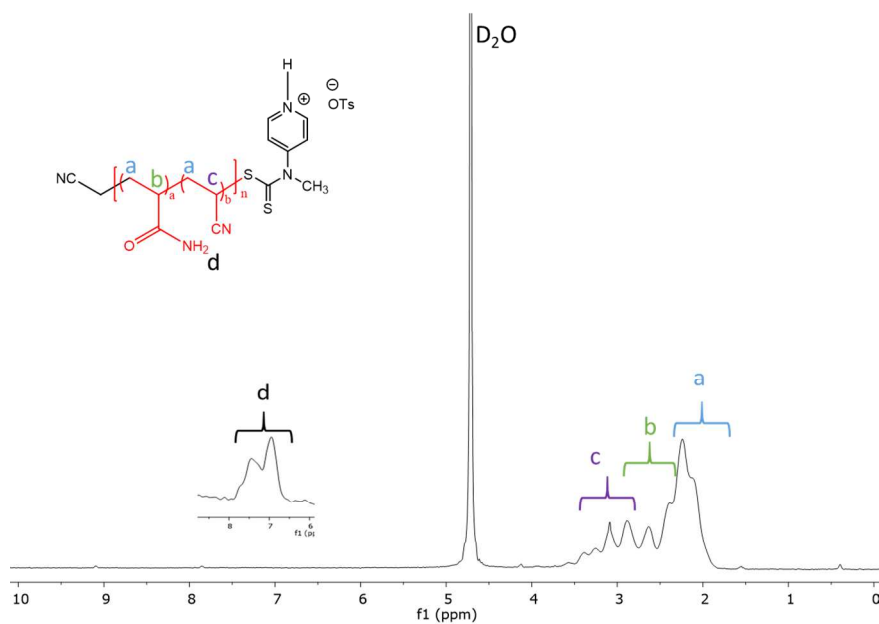

**Fig. S2.**  $^1\text{H}$  NMR spectra of P(AAm-co-AN) in  $\text{D}_2\text{O}$  at  $70^\circ\text{C}$ . The inset shows the signal for  $\text{NH}_2$  protons measured in  $\text{DMSO}-d_6$  at  $25^\circ\text{C}$ .

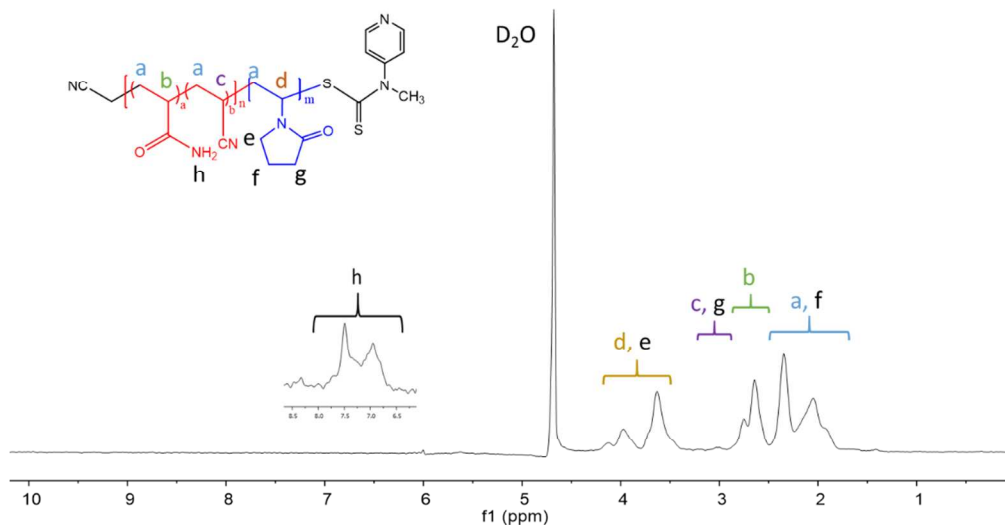

**Fig. S3.**  $^1\text{H}$  NMR spectra of P(AAm-co-AN)-b-PVP in  $\text{D}_2\text{O}$  at  $70^\circ\text{C}$ . The inset shows the signal for  $\text{NH}_2$  protons measured in  $\text{DMSO}-d_6$  at  $25^\circ\text{C}$ .

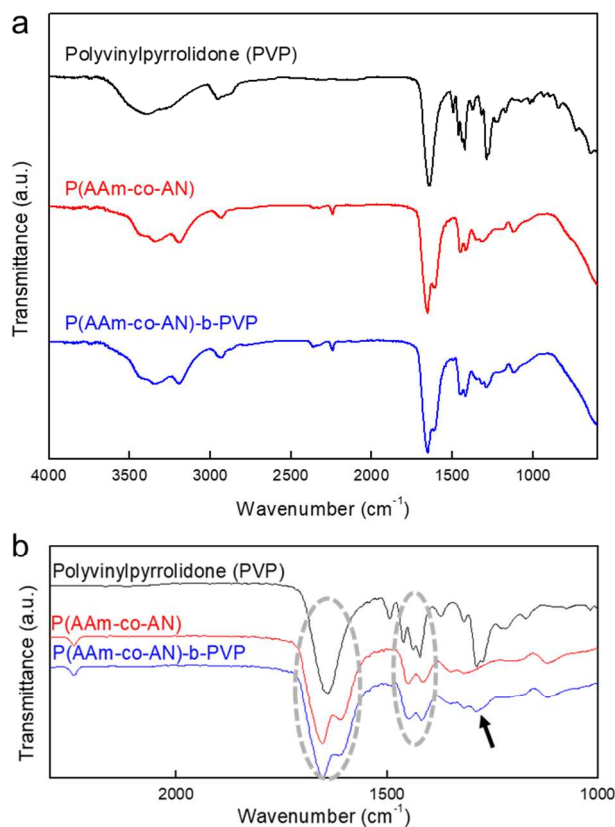

**Fig. S4.** (a) FTIR spectra of PVP, P(AAm-co-AN) and P(AAm-co-AN)-b-PVP; (b) illustration of a spectral overlap in the  $1620\text{--}1690$  and  $1400\text{--}1480\text{ cm}^{-1}$  spectral regions (circled), and

emergence in the spectrum of P(AAm-*co*-AN)-*b*-PVP of a band at  $1291\text{cm}^{-1}$  (indicated by arrow) which is associated with C-N stretching vibrations and is indicative of incorporation of PVP within the copolymer.

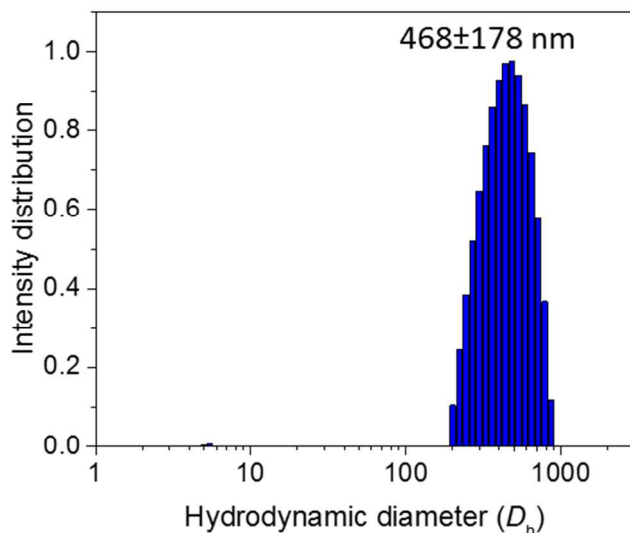

**Fig. S5.** Hydrodynamic diameter in a 2 mg/ml solution of P(AAm-*co*-AN) in PBS (pH 7.0) after 5-min incubation at 22 °C. Prior to measurements, the solution was preheated at 50 °C.

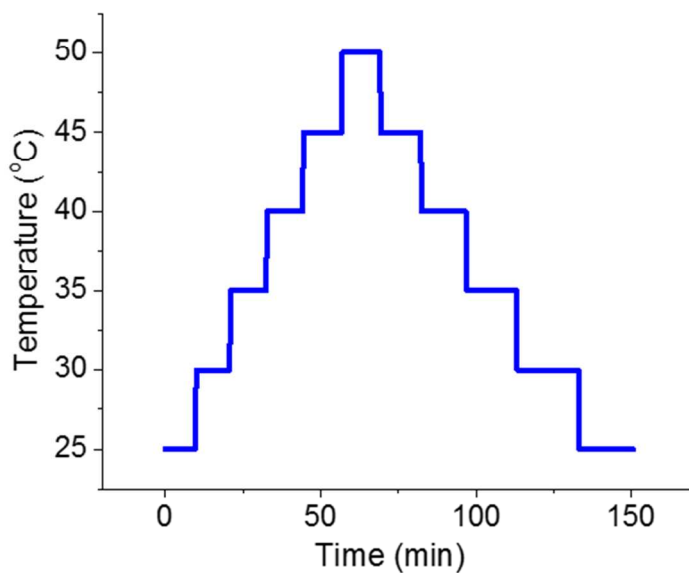

**Fig. S6.** The stepwise heating/cooling profile used for ellipsometry measurements to determine the equilibrium thicknesses of swollen BCM/TA films.

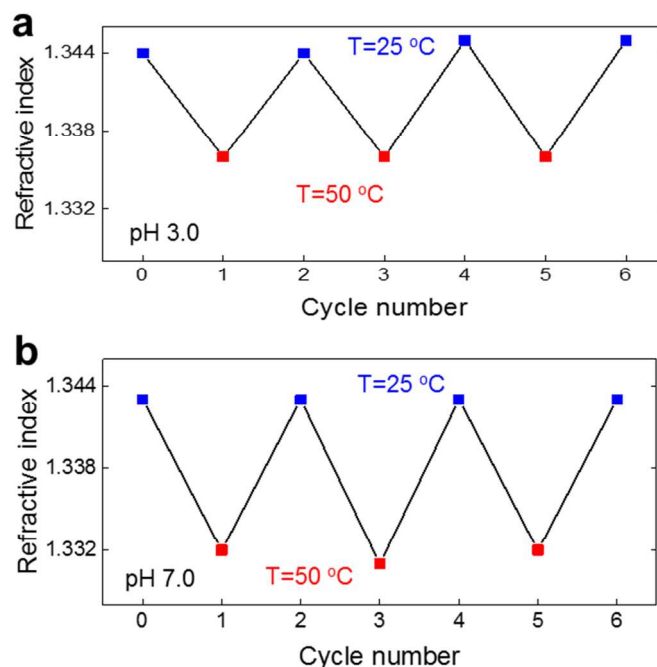

**Fig. S7.** Temperature-induced variations in refractive indices of 2.5-bl BCM/TA films at pH 3.0 (a) and pH 7.0 (b) as measured by *in situ* spectroscopic ellipsometry during alternating exposure of the film to PBS solutions at 25 and 50 °C.

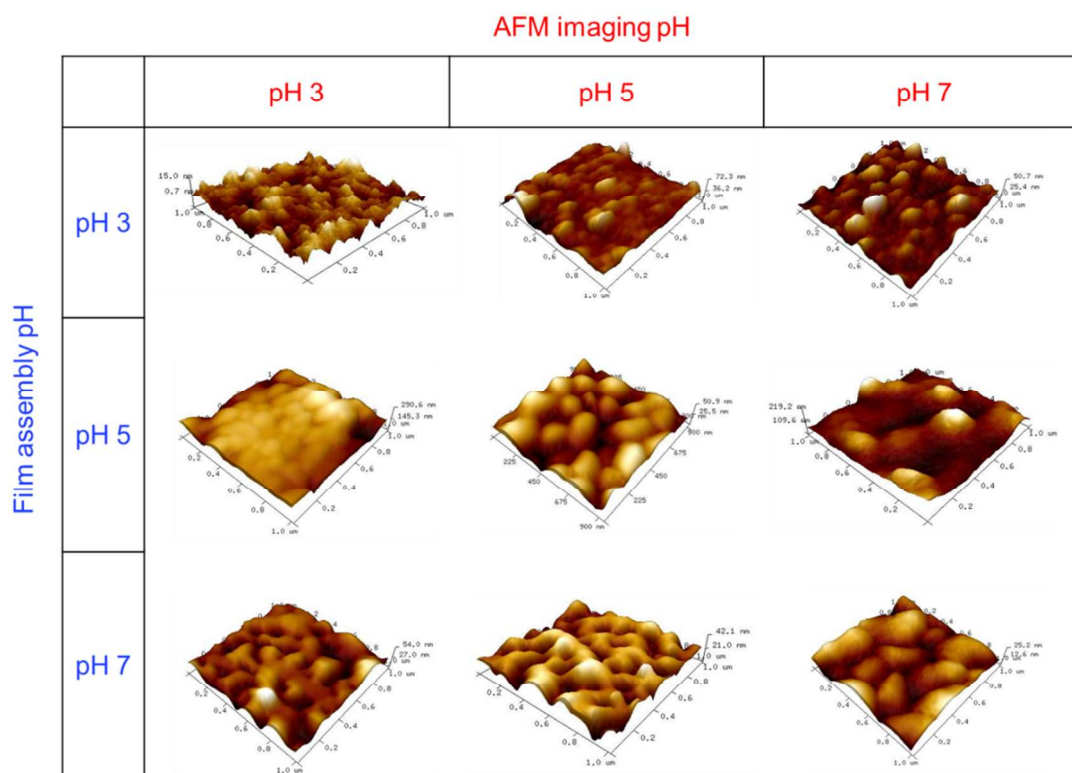

**Fig. S8.** AFM height images of 2.5-bl films deposited at different pH values (3, 5 and 7) when immersed in PBS of varied pH at 25 °C.

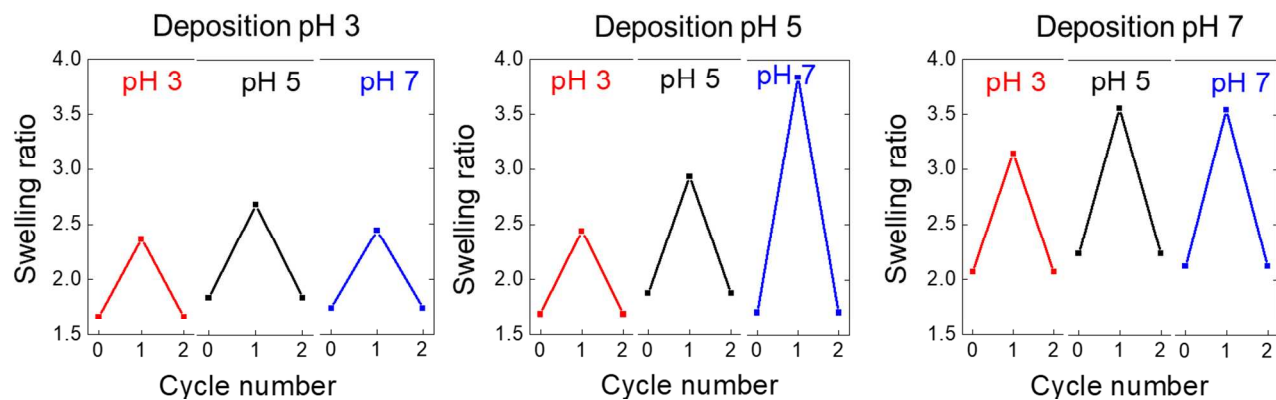

**Fig. S9.** *In situ* ellipsometry measurements of swelling of 2.5-bl films during one 25-50°C temperature cycle. The films were deposited at different pH values (3, 5 and 7) and immersed in PBS of varied acidity.
